# Supplementary material
Source: PubMed Central journal article supplement (PMC4496259)
Supplement: NIHMS686748-supplement-1.pdf [file NIHMS686748-supplement-1.pdf]

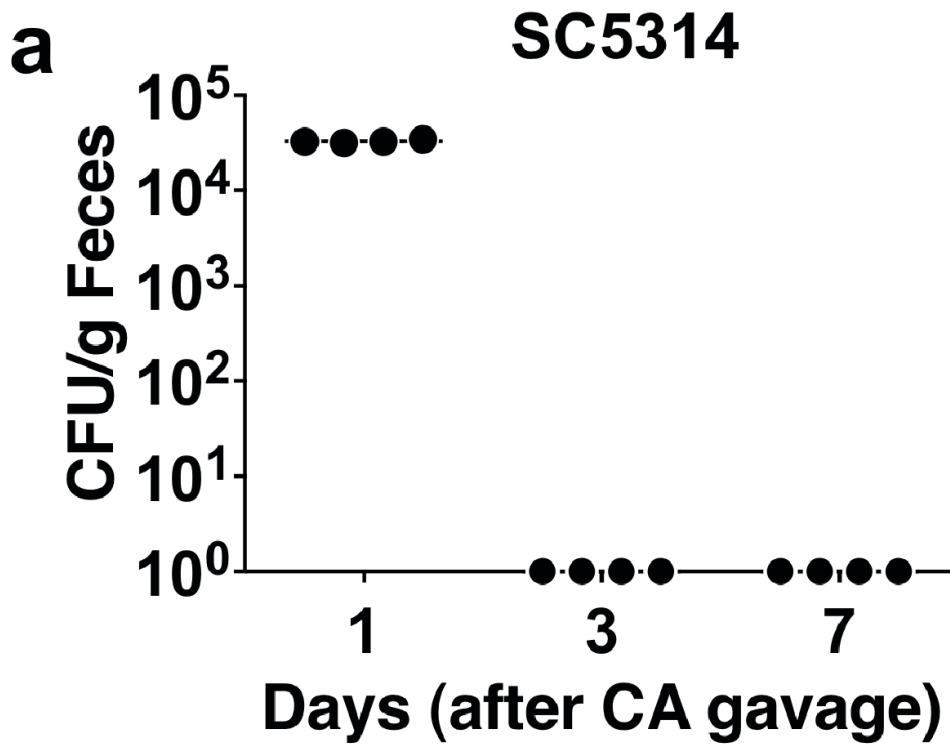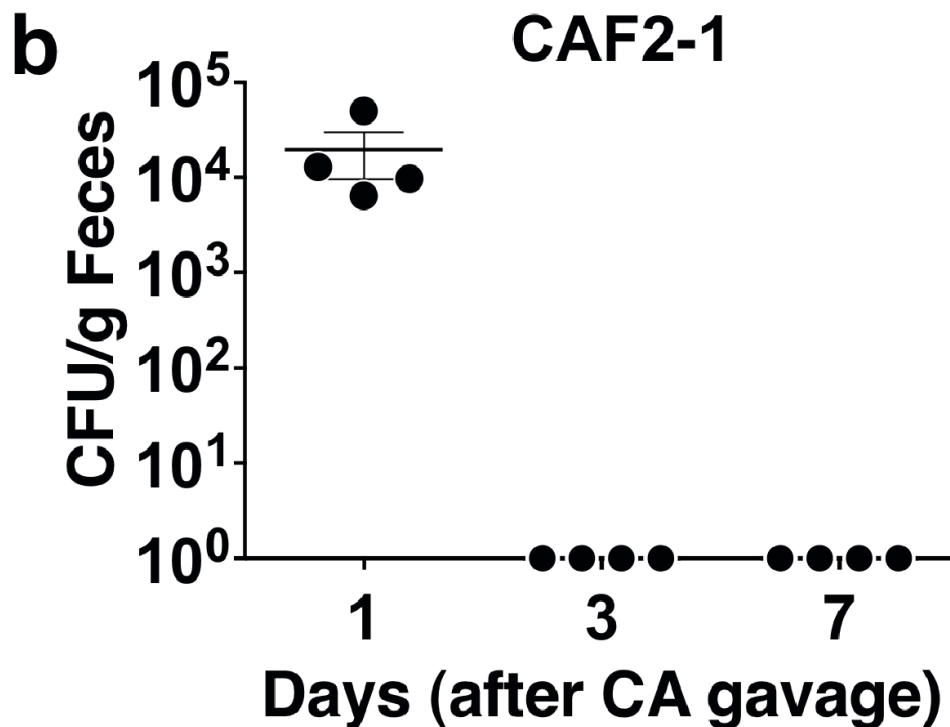

**Supplementary Figure 1. Murine-adapted *Candida albicans* GI colonization levels in adult mice.** Murine-adapted *C. albicans* strains (a) SC5314 and (b) CAF2-1 GI colonization levels in untreated (no antibiotics) C3H/HeN adult mice (Harlan, female, 6-8 weeks). n=4. Points represent results from individual animals, and horizontal lines with bars representing the median with interquartile range.

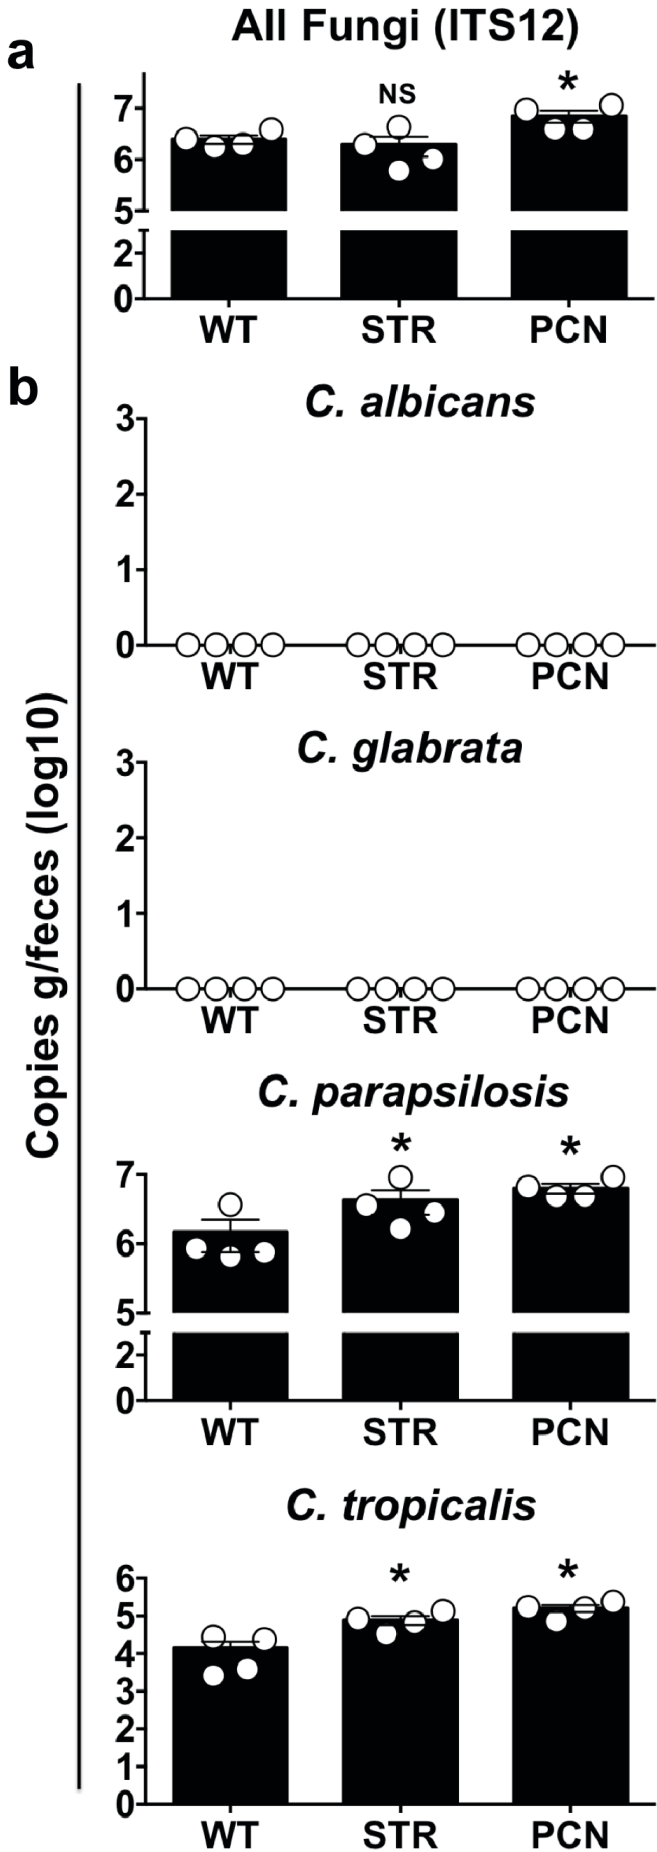

**Supplementary Figure 2. Quantification of endogenous fungal flora in the GI tracts of C3H/HeN Mice**

(a) ITS1-2 rDNA levels of gDNA recovered from fecal specimens of C3H/HeN mice (Harlan, female, 6-8 weeks old) treated with sterile water (WT), streptomycin (STR) or penicillin G (PCN) in the drinking water for 5 days. (b) *C. albicans*, *C. glabrata*, *C. parapsilosis*, and *C. tropicalis* levels as determined by qPCR on microbial gDNA recovered from fecal specimens of C3H/HeN adult mice pre-treated with or without antibiotics in the drinking water for 5 days. Points represent results from individual animals, and horizontal lines with bars representing the mean with SEM. n=4. Statistical analysis was performed by Mann-Whitney test. \* p< 0.05; ns, not significant.

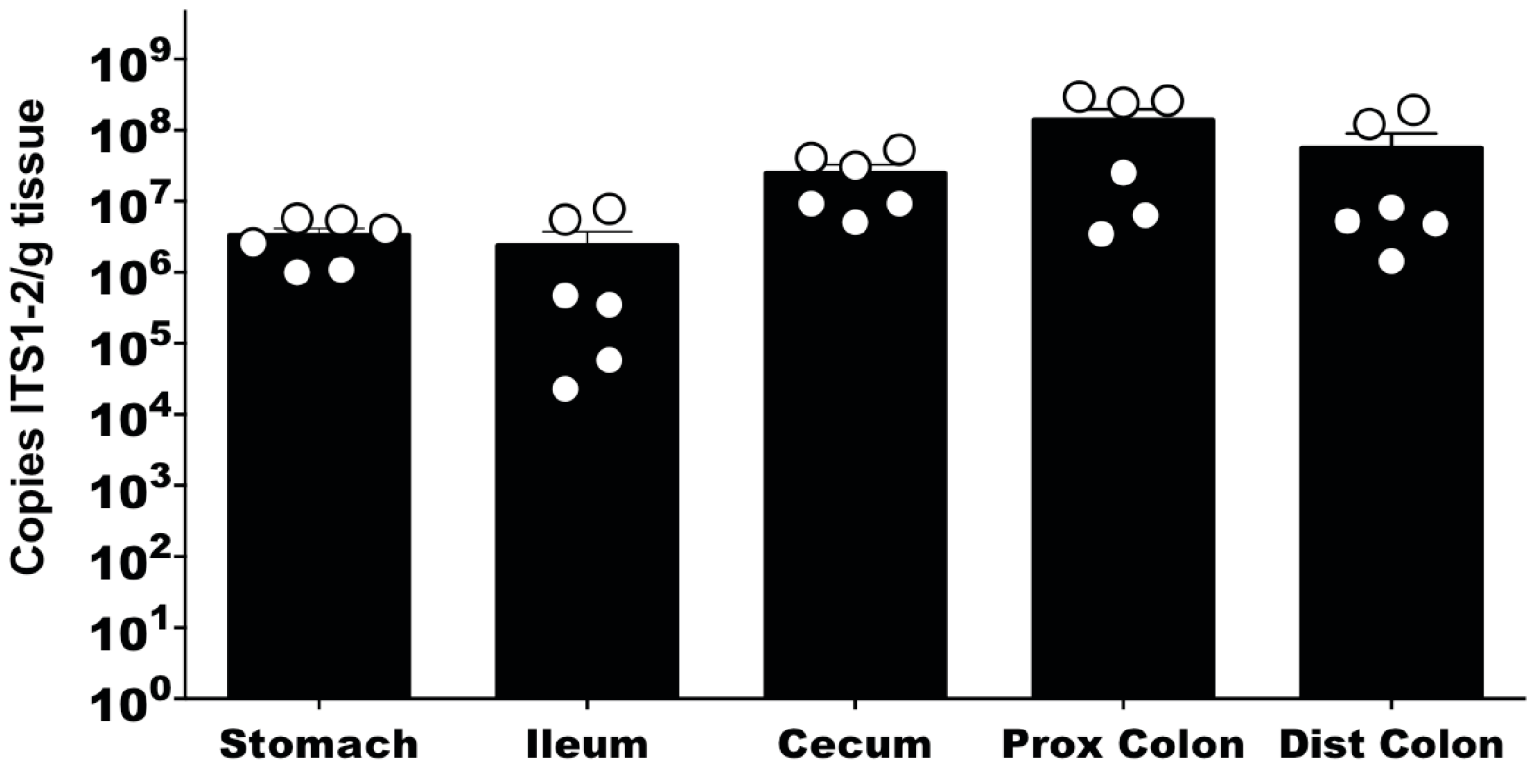

**Supplementary Figure 3. Quantification of fungi in mucosa isolated from stomach, ileum, cecum, proximal and distal colon of mice.** ITS1-2 rDNA level of intestinal segments of C3H/HeN mice (Harlan, female, 6-8 weeks old) treated with penicillin/streptomycin and colonized with *C. albicans* strain SC5314. Data was generated by qPCR and normalized to 18S rDNA. Points represent results from individual animals, and horizontal lines with bars representing the mean with SEM. n=6.

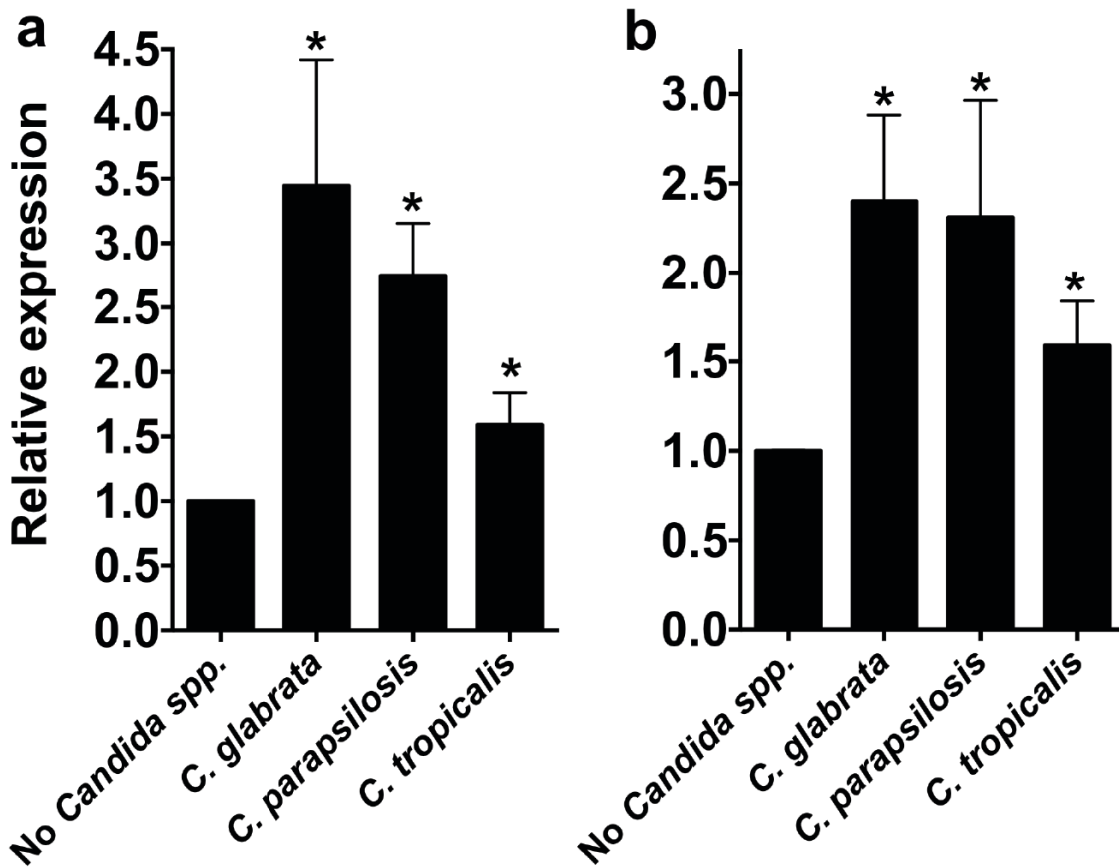

**Supplementary Figure 4. *C. glabrata*, *C. parapsilosis*, and *C. tropicalis* induce *Hif1a* and *Cramp* expression in colons of antibiotic-treated mice.**

(a) *Hif1a* and (b) *Cramp* gene expression in colons of antibiotic (PS)-treated mice +/- oral gavage with *Candida* spp. ( $2 \times 10^8$  cfu). *Candida* spp.: *C. glabrata*, ATCC 15126; *C. parapsilosis*, clinical isolate; and *C. tropicalis*, ATCC 66029. Mice (C3H/HeN, Harlan, female, 6-8 weeks) were maintained on PS water, and colons were resected 7 days after *Candida* gavage. For all experiments,  $n=4$ . All data shown are means  $\pm$  SEM. Assays were performed in triplicate. Statistical analysis was performed by Mann-Whitney test. \*  $p < 0.05$ ; \*\*  $p < 0.01$ ; ns, not significant.

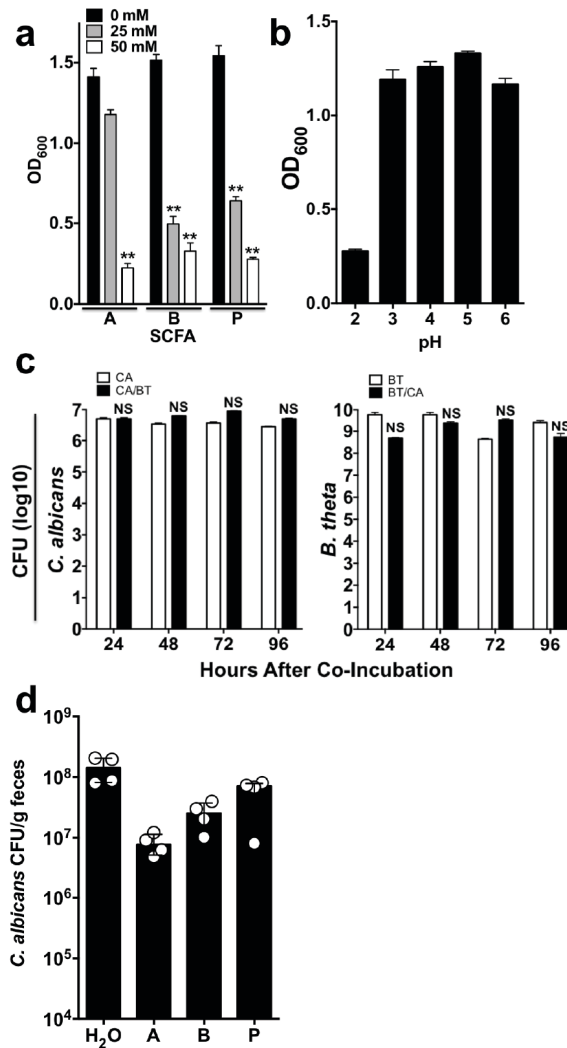

**Supplementary Figure 5. Small-chain fatty acids (SCFAs) inhibit *C. albicans* growth *in vitro* and decrease *C. albicans* colonization in mice.** OD<sub>600</sub> readings of *C. albicans* grown (a) aerobically ± SCFA in YPD media (pH 3-6) at 30°C for 12 hours and (b) aerobically in YPD media (pH 2-6, adjusted by HCl) at 30°C for 12 hours. A = acetic, B = butyric, P=propionic acid. Means ± SEM. Assays were performed in triplicate. Mann-Whitney test. \* p< 0.05; \*\* p<0.01 (c) Quantification of *C. albicans* strain SC5314 and *B. theta* grown in TYG media at 37°C under anaerobic conditions. CA and *B. theta* were first grown individually in TYG media at 37°C under anaerobic conditions. Cultures were then diluted to an OD<sub>600</sub> = 0.2 for the initial time point (0 hours). CA and *B. theta* co-cultures were created by combining equivalent volumes of CA and *B. theta* individual diluted cultures. Cultures were samples at selected time points and CA and *B. theta* (CFU) were enumerated by plating on YVG agar (aerobically) and BHI/Blood agar (anaerobically), respectively. Bars represent means ±SEM. Assays were performed in triplicate. Mann-Whitney test. ns, non-significant. (d) *C. albicans* GI colonization levels in mice pre-treated with antibiotics (PS water), colonized with *C. albicans*, and then treated with PS water ± 50 mM SCFAs. Colonization levels were checked after 14 days of SCFA water treatment. n=4. Points represent results from individual animals. Horizontal lines with bars represent the median with interquartile range. Mann-Whitney test. \* p<0.05. A= acetic, B= butyric, P=propionic acid, H20 = PS water adjusted for pH. (Supplementary Table 2).

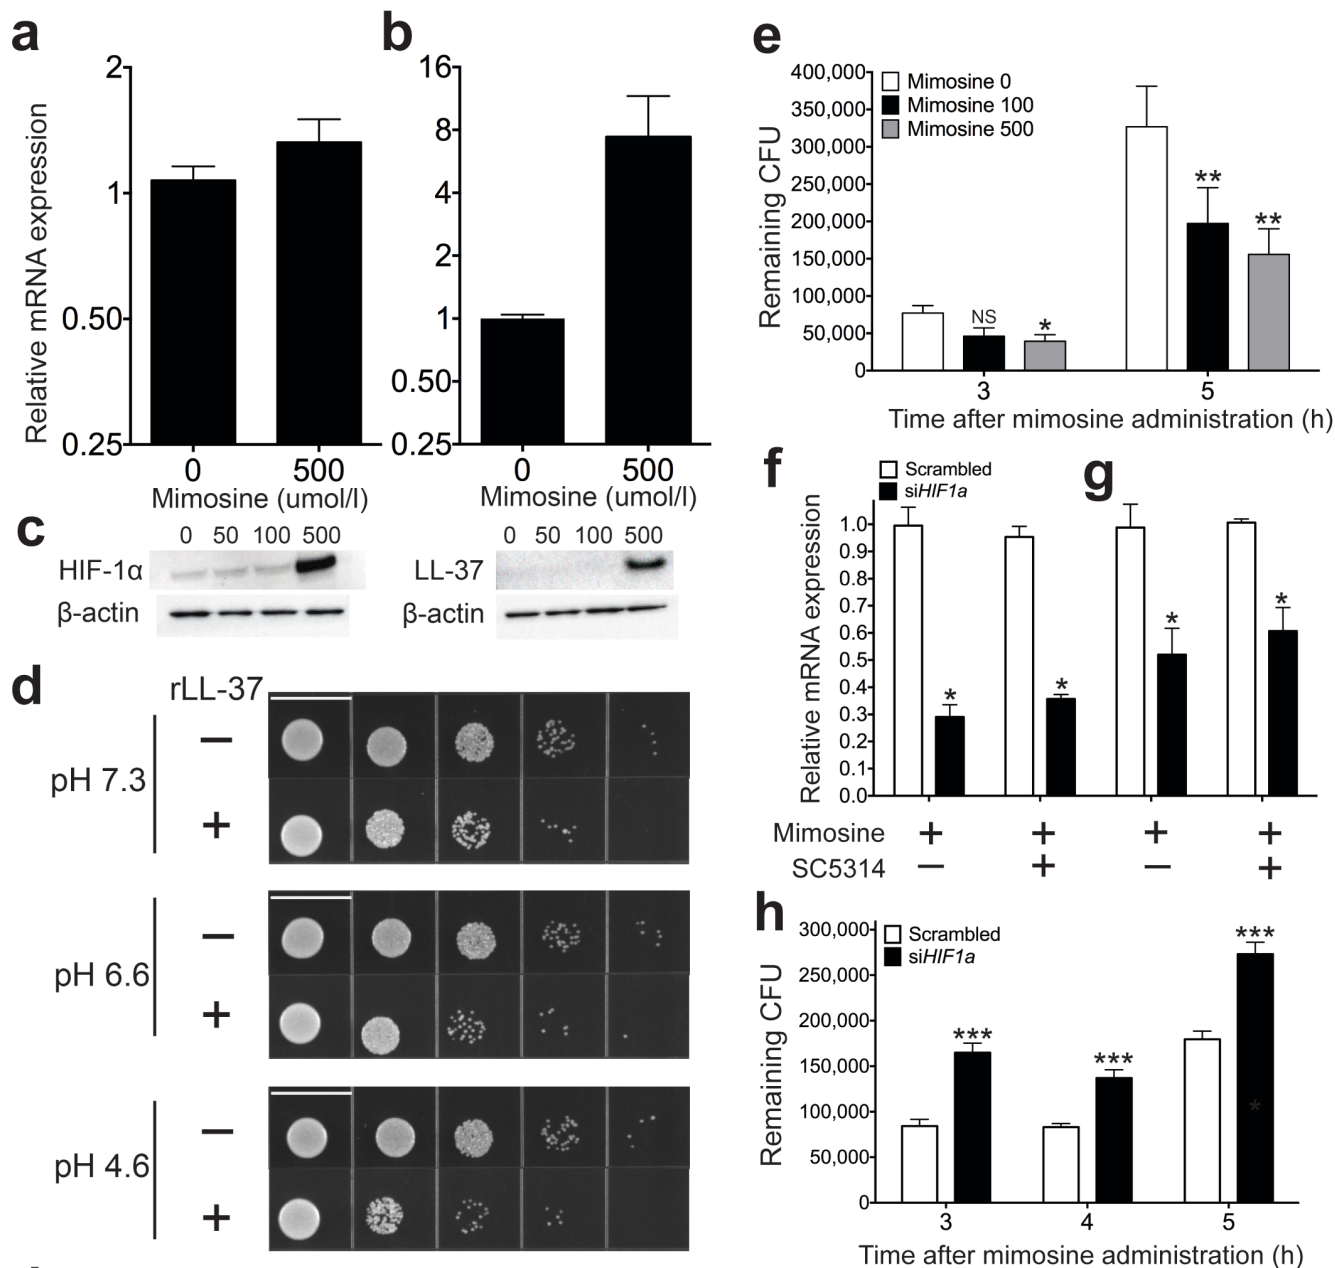

**Supplementary Figure 6. Pharmacologic activation of HIF-1 $\alpha$  induces LL-37 expression and boosts *C. albicans* clearance by human colonocytes.** (a) HIF1a and (b) LL-37 mRNA and (c) protein expression in HT-29 human colonocytes treated with L-mimosine. (d) Spot assay to determine Candidacidal activity of recombinant LL-37 (30  $\mu$ g/ml) in the setting of varying pH. Scale bar, 13 mm. (e) Extracellular killing of *C. albicans* strain SC5314 (multiplicity of infection, 1 yeast per cell) by HT-29 cells incubated with 0-500  $\mu$ M L-mimosine. Three separate experiments with three replicates per experiment were conducted. (f) HIF1a and (g) LL-37 gene expression in human colonocytes treated with siRNAHIF1a while concurrently being exposed to L-mimosine  $\pm$  *C. albicans*. Assays were performed in triplicate. (h) Extracellular killing of *C. albicans* strain SC5314 by HT-29 cells incubated with 0-500  $\mu$ M L-mimosine and then transfected  $\pm$  siRNAHIF1a. Three separate experiments with three replicates per experiment were conducted. For all experiments, statistical analysis by Mann-Whitney test, \*  $p < 0.05$ , \*\*  $p < 0.01$ , \*\*\*  $p < 0.001$ . (i) Quantification of *Candida albicans* strain SC5314 grown in RPMI-1640 with 10% FCS  $\pm$  L-mimosine at 37°C for 8 hours. Bars represent means  $\pm$  SEM. Assays were performed in triplicate. Statistical analysis was performed by unpaired Student's t-test. \*  $p < 0.05$ ; \*\*  $p < 0.01$ ; ns, not significant.

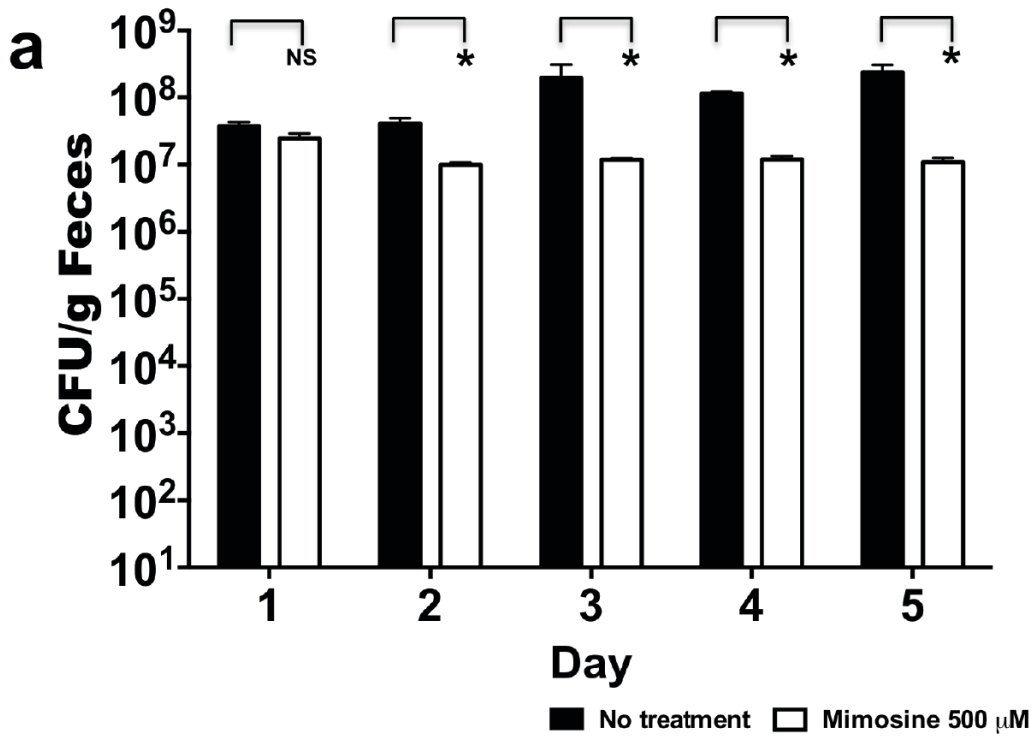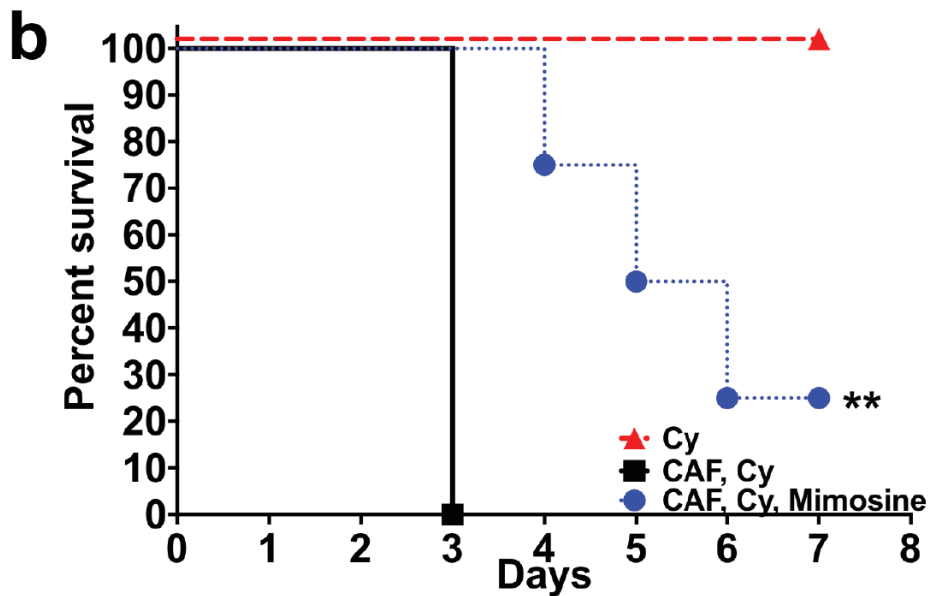

**Supplementary Figure 7. L-mimosine treatment decreases *Candida albicans* CAF2-1 GI colonization and decreases dissemination.** (a) *C. albicans* strain CAF2-1 GI colonization levels in *Hlf1a<sup>fl/fl</sup>* mice treated  $\pm$  L-mimosine. n=8. Bars represent the mean with SEM. Statistical analysis was performed by Mann-Whitney test. \* p<0.05; \*\* p<0.001; ns, not significant. (b) Survival curves of *Hlf1a<sup>fl/fl</sup>* mice treated  $\pm$  L-mimosine after the administration of cyclophosphamide. n=8. Statistical analysis was performed by log-rank test. \* p< 0.05; \*\* p<0.01; ns, not significant.

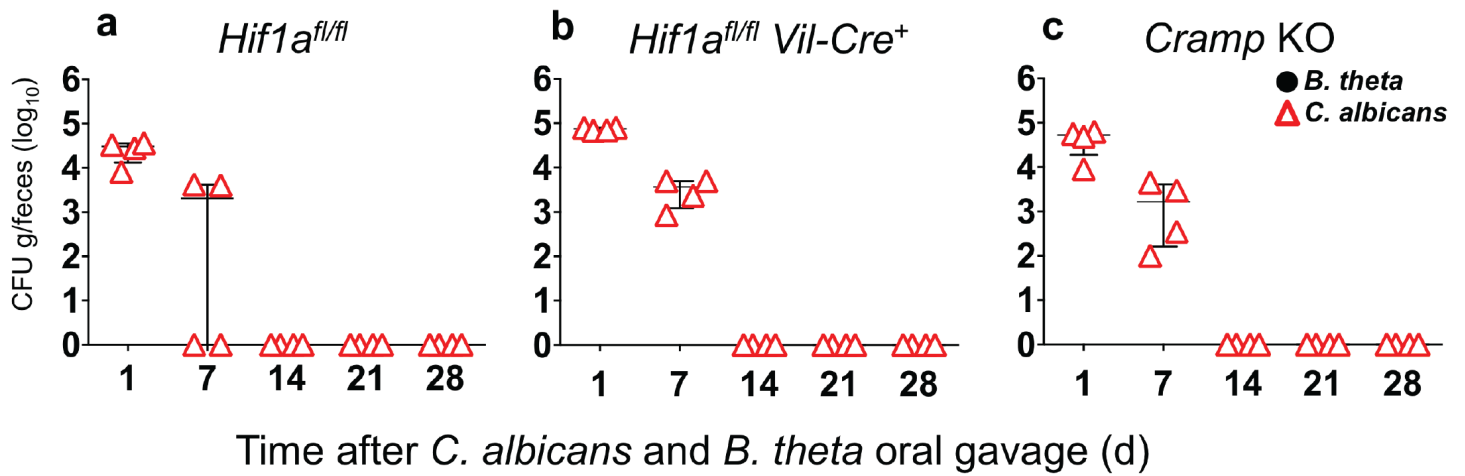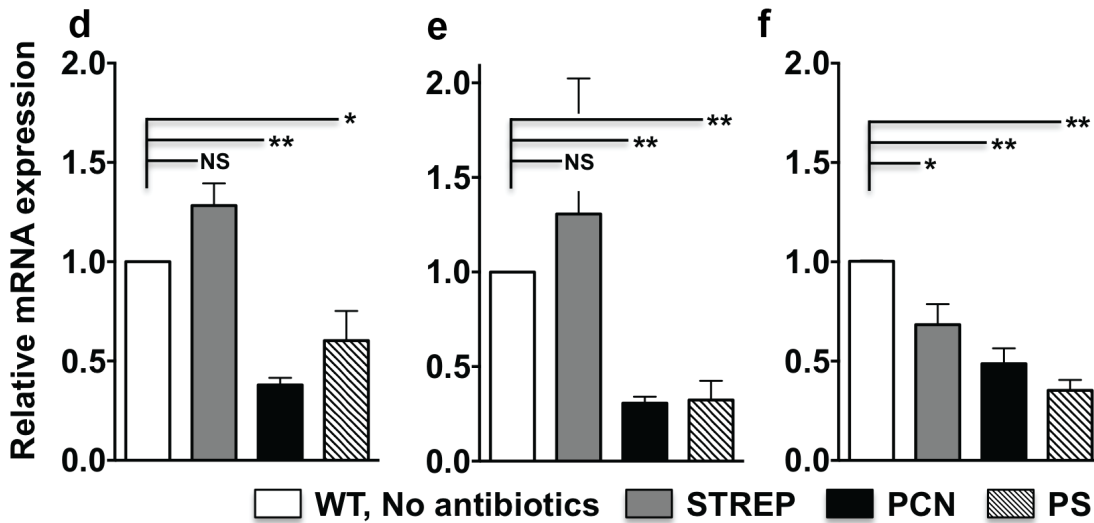

**Supplementary Figure 8** *Hif1a* and *Cramp* are not necessary for *C. albicans* GI colonization resistance in wild-type mice. *Candida albicans* (red triangle) GI colonization levels of (a) *Hif1a<sup>fl/fl</sup>*, (b) *Hif1a<sup>fl/fl</sup> Vil-Cre<sup>+</sup>*, and (c) *Cramp* KO mice not pre-treated with antibiotics and orally gavaged with *C. albicans* strain SC5314. n=4. Points represent results from individual animals. Horizontal lines with bars represent the median with interquartile range. (d) mouse  $\beta$ -defensin 1 (*mBD-1*), (e) mouse  $\beta$ -defensin 2 (*mBD-2*), and (f) *Ili7a* gene expression in murine colons. Colonic expression of *mBD-1*, *mBD-2*, and *Ili7a* in C3H/HeN mice treated with sterile water (WT), streptomycin (STREP), penicillin G (PCN), or penicillin/streptomycin (PS). Mice deficient in *Mmp7* (thus deficient in beta-defensins) or *Ili7a* still maintain resistance to CA colonization in the absence of antibiotics (data not shown). n=4. All data shown are means  $\pm$  SEM. Statistical analysis was performed by Mann-Whitney. \* p< 0.05; \*\* p<0.01; ns, not significant.



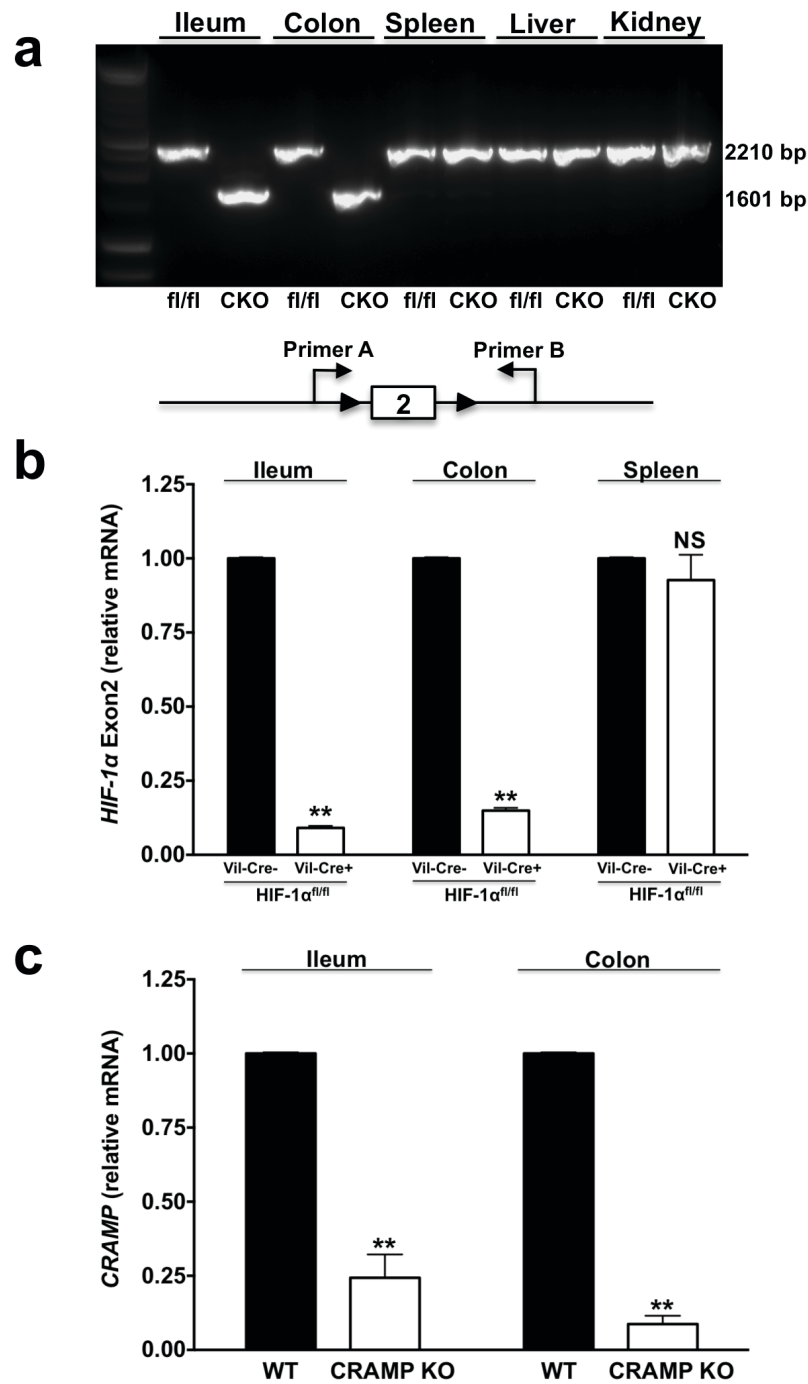

**Supplementary Figure 9. Molecular characterization of *Hif1a*<sup>fl/fl</sup>, *Hif1a*<sup>fl/fl</sup> *Vil-Cre*<sup>+</sup>, and *Cramp* KO mice.** (a) Deletion of *Hif1a* Exon 2 is confirmed in the small and large intestines, but is absent in the spleen, liver, and kidney of *Hif1a*<sup>fl/fl</sup> *Vil-Cre*<sup>+</sup> (CKO) mice. Primer pair A/B amplifies a 1601 bp product when exon 2 is deleted (ileum, colon) and a 2210 bp product when exon 2 is intact (spleen, liver, and kidney). (b) *Hif1a* Exon 2 mRNA levels in ileums, colons, and spleens of *Hif1a*<sup>fl/fl</sup> and *Hif1a*<sup>fl/fl</sup> *Vil-Cre*<sup>+</sup> mice as determined by qPCR. n=4. *Hif1a* Exon 2 expression levels were normalized to both *Hif1a* Exon 9 (which is not deleted) and 18s rRNA. (c) *Cramp* mRNA levels in ileums and colons of *Cramp* KO and WT (C57/BL6J) mice. n=4. Bars represent means  $\pm$ SEM. Assays were performed in triplicate. Statistical analysis was performed by unpaired Student's t-test. \* p<0.05; \*\* p<0.01; ns, not significant.

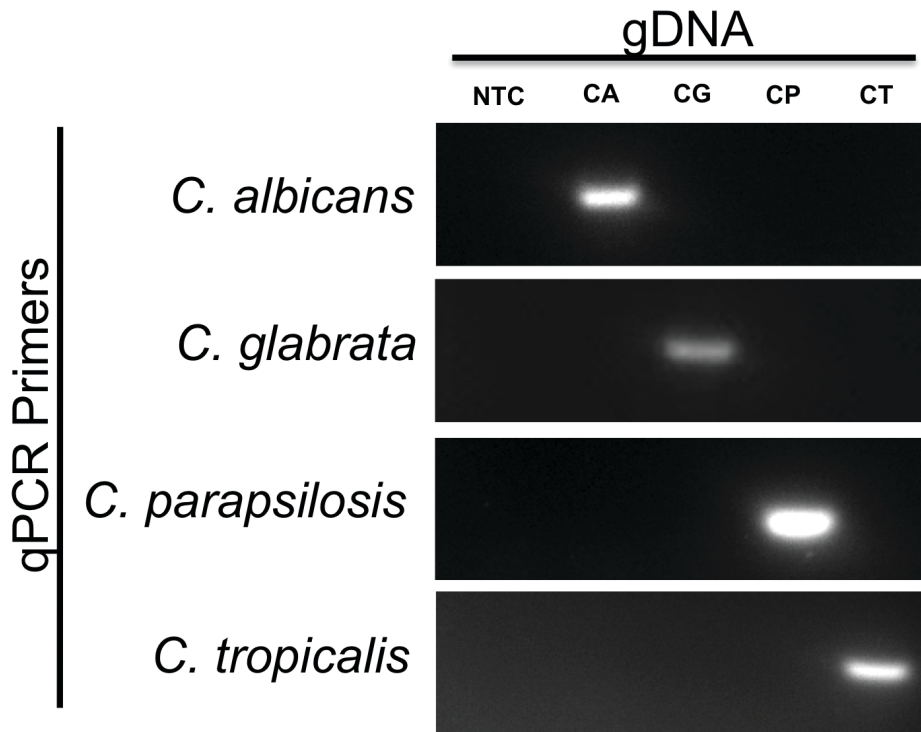

**Supplementary Figure 10. Specificity of *Candida spp.* qPCR.** *Candida spp.* specific qPCR (e.g. *C. albicans* qPCR) generates PCR products of the appropriate size when genomic DNA of corresponding *Candida spp.* (*C. albicans* gDNA) is used but not with gDNA of other *Candida spp.* (i.e. *C. glabrata*, *C. parapsilosis*, *C. tropicalis*). NTC, no template control; CA, *C. albicans*; CG, *C. glabrata*; CP, *C. parapsilosis*; CT, *C. tropicalis*.

Supplementary Table 1. Mouse strains used in this study

| Strain                                           | Source  | Sex and Age                | Experiments (n= number of mice used)                                                                                                                                                                                                                                                                                                                                               |
|--------------------------------------------------|---------|----------------------------|------------------------------------------------------------------------------------------------------------------------------------------------------------------------------------------------------------------------------------------------------------------------------------------------------------------------------------------------------------------------------------|
| C57/BL6                                          | Harlan  | Female, 7 d to 8 weeks old | Fig. 1a (n=48)                                                                                                                                                                                                                                                                                                                                                                     |
| Swiss Webster                                    | Harlan  | Female, 6-8 weeks old      | Data not shown (n=4)                                                                                                                                                                                                                                                                                                                                                               |
| Balb/c                                           | Harlan  | Female, 6-8 weeks old      | Data not shown (n=4)                                                                                                                                                                                                                                                                                                                                                               |
| C57/BL6                                          | Taconic | Female, 6-8 weeks old      | Data not shown (n=4)                                                                                                                                                                                                                                                                                                                                                               |
| C57/BL6J                                         | Jackson | Female, 6-8 weeks old      | Fig. 1b (n=4, germ-free)<br>Fig. 2g (n=4, germ-free)<br>Fig. 2h (n=4, germ-free)<br>Fig. 3i-j (n=12, germ-free)                                                                                                                                                                                                                                                                    |
| C3H/HeN                                          | Harlan  | Female, 6-8 weeks old      | Fig. 1d (n=36), 1e (n=36)<br>Supplementary Fig. 1 (n=8)<br>Fig. 2a, 2c (n=32)<br>Fig. 2b (n=3)<br>Fig. 2d-3 (n=5)<br>Fig. 2f (n=64)<br>Supplementary Fig. 2 (n=12)<br>Fig. 3a-b; Supplementary Fig. 8d-f (n=16)<br>Fig. 3c-d (n=8)<br>Fig. 3e-h (n=24)<br>Supplementary Fig. 3 (n=6)<br>Supplementary Fig. 4 (n=16)<br>Supplementary Fig. 5d (n=16)<br>Supplementary Fig. 6 (n=24) |
| <i>Hif1a<sup>fl/fl</sup></i>                     | Jackson | Sex-matched, 6-8 weeks old | Fig. 4a (n=16)<br>Fig. 4c (n=24; 16 from Fig. 4a and 8 additional for <i>Hif1a<sup>fl/fl</sup></i> , Cy control)<br>Fig. 4e-f (n=8)<br>Fig 4g (n=6)<br>Supplementary Fig. 8a (n=4)<br>Supplementary Fig. 9 (n=4)                                                                                                                                                                   |
| <i>Hif1a<sup>fl/fl</sup> Vil-Cre<sup>+</sup></i> | Jackson | Sex-matched, 6-8 weeks old | Fig. 4a (n=8)<br>Fig. 4c (n=8; 8 from Fig 4a)<br>Fig. 4e-f (n=4)<br>Fig. 4g (n=5)<br>Supplementary Fig. 8b (n=4)<br>Supplementary Fig. 9 (n=4)                                                                                                                                                                                                                                     |

|                 |         |                               |                                                                                                                                                                                                     |
|-----------------|---------|-------------------------------|-----------------------------------------------------------------------------------------------------------------------------------------------------------------------------------------------------|
| <i>Cramp</i> KO | Jackson | Sex-matched,<br>6-8 weeks old | Fig. 4b (n=16)<br>Fig. 4d (n=24; 8 from Fig 4b and 8<br>additional for <i>Cramp</i> KO, Cy control)<br>Fig. 4e-f (n=4)<br>Fig. 4g (n=6)<br>Supplementary Fig. 8b (n=4)<br>Supplementary Fig 9 (n=4) |
|-----------------|---------|-------------------------------|-----------------------------------------------------------------------------------------------------------------------------------------------------------------------------------------------------|

Supplementary Table 2. *Candida albicans* and Bacterial GI Colonization Levels

| <b>Antibiotic Experiments (Fig. 1a)</b>    | <b>Median (cfu/g feces)</b> | <b>First Quartile (cfu/g feces)</b> | <b>Third Quartile (cfu/g feces)</b> |
|--------------------------------------------|-----------------------------|-------------------------------------|-------------------------------------|
| No antibiotics (WT)                        | 0                           | 0                                   | 0                                   |
| Streptomycin (STR)                         | 0                           | 0                                   | 0                                   |
| Penicillin (PCN)                           | $1.70 \times 10^7$          | $1.34 \times 10^7$                  | $2.52 \times 10^7$                  |
| Penicillin/Streptomycin (PS)               | $2.52 \times 10^7$          | $1.04 \times 10^7$                  | $4.07 \times 10^7$                  |
| Clindamycin ( C )                          | $7.27 \times 10^4$          | $4.97 \times 10^4$                  | $8.55 \times 10^4$                  |
| Metronidazole (M)                          | $1.38 \times 10^4$          | $5.23 \times 10^3$                  | $8.37 \times 10^4$                  |
|                                            |                             |                                     |                                     |
| <b>Germ Free (Fig. 1b)</b>                 |                             |                                     |                                     |
| Germ-Free Mice                             | $1.7 \times 10^7$           | $1.02 \times 10^7$                  | $2.24 \times 10^7$                  |
|                                            |                             |                                     |                                     |
| <b>Infant/Adolescent Mice (Fig. 1c)</b>    |                             |                                     |                                     |
| 14 day old                                 | $2.56 \times 10^5$          | $4.00 \times 10^4$                  | $7.38 \times 10^5$                  |
| 28 day old                                 | $3.06 \times 10^4$          | $5.95 \times 10^3$                  | $8.30 \times 10^4$                  |
| 42 day old                                 | 0                           | 0                                   | 0                                   |
|                                            |                             |                                     |                                     |
| <b>Other CA (Fig. 1d)</b>                  |                             |                                     |                                     |
| WO-1, WT                                   | 0                           | 0                                   | 0                                   |
| WO-1, STR                                  | 0                           | 0                                   | 0                                   |
| WO-1, PCN                                  | $2.59 \times 10^6$          | $1.31 \times 10^6$                  | $1.49 \times 10^7$                  |
|                                            |                             |                                     |                                     |
| Can098, WT                                 | 0                           | 0                                   | 0                                   |
| Can098, STR                                | 0                           | 0                                   | 0                                   |
| Can098, PCN                                | $1.73 \times 10^5$          | $7.76 \times 10^4$                  | $7.55 \times 10^5$                  |
|                                            |                             |                                     |                                     |
| 3153A, WT                                  | 0                           | 0                                   | 0                                   |
| 3153A, STR                                 | 0                           | 0                                   | 0                                   |
| 3153A, PCN                                 | $9.62 \times 10^6$          | $7.84 \times 10^6$                  | $1.42 \times 10^7$                  |
|                                            |                             |                                     |                                     |
| <b>Other <i>Candida</i> spp. (Fig. 1e)</b> |                             |                                     |                                     |
| <i>C. glabrata</i> ATCC 15126, WT          | 0                           | 0                                   | 0                                   |
| <i>C. glabrata</i> ATCC 15126, STR         | $5.35 \times 10^7$          | $3.82 \times 10^7$                  | $7.36 \times 10^7$                  |
| <i>C. glabrata</i> ATCC 15126, PCN         | $5.76 \times 10^7$          | $4.74 \times 10^7$                  | $7.39 \times 10^7$                  |
|                                            |                             |                                     |                                     |

|                                           |                    |                    |                       |
|-------------------------------------------|--------------------|--------------------|-----------------------|
| <i>C. parapsilosis</i> ,<br>clinical, WT  | 0                  | 0                  | 0                     |
| <i>C. parapsilosis</i> ,<br>clinical, STR | $9.62 \times 10^6$ | $9.62 \times 10^6$ | $9.62 \times 10^6$    |
| <i>C. parapsilosis</i> ,<br>clinical, PCN | $9.62 \times 10^6$ | $9.62 \times 10^6$ | $9.62 \times 10^6$    |
|                                           |                    |                    |                       |
| <i>C. tropicalis</i> ATCC<br>66029, WT    | 0                  | 0                  | 0                     |
| <i>C. tropicalis</i> ATCC<br>66029, STR   | 0                  | 0                  | 0                     |
| <i>C. tropicalis</i> ATCC<br>66029, PCN   | $2.49 \times 10^7$ | $2.05 \times 10^7$ | $4.13 \times 10^7$    |
|                                           |                    |                    |                       |
| <b>Bacterial Add Back<br/>(Fig. 2f)</b>   |                    |                    |                       |
| No Bacteria                               |                    |                    |                       |
| <i>C. albicans</i>                        | $9.27 \times 10^3$ | $1.81 \times 10^3$ | $4.75 \times 10^5$    |
|                                           |                    |                    |                       |
| <i>E. coli</i>                            |                    |                    |                       |
| <i>E. coli</i>                            | $1.47 \times 10^8$ | $7.64 \times 10^7$ | $7.55 \times 10^8$    |
| <i>C. albicans</i>                        | $7.33 \times 10^4$ | $6.76 \times 10^2$ | $2.00 \times 10^5$    |
|                                           |                    |                    |                       |
| <i>P. aeruginosa</i>                      |                    |                    |                       |
| <i>P. aeruginosa</i>                      | $2.52 \times 10^7$ | $1.53 \times 10^7$ | $1.03 \times 10^8$    |
| <i>C. albicans</i>                        | $1.02 \times 10^5$ | $5.10 \times 10^3$ | $1.47 \times 10^5$    |
|                                           |                    |                    |                       |
| <i>B. fragilis</i>                        |                    |                    |                       |
| <i>B. fragilis</i>                        | $7.22 \times 10^8$ | $2.03 \times 10^8$ | $1.88 \times 10^{10}$ |
| <i>C. albicans</i>                        | $1.83 \times 10^4$ | $5.14 \times 10^3$ | $2.77 \times 10^4$    |
|                                           |                    |                    |                       |
| <i>B. thetaiotamicron</i>                 |                    |                    |                       |
| <i>B. thetaiotamicron</i>                 | $5.27 \times 10^9$ | $1.68 \times 10^9$ | $6.15 \times 10^9$    |
| <i>C. albicans</i>                        | 0                  | 0                  | 0                     |
|                                           |                    |                    |                       |
| <i>B. producta</i>                        |                    |                    |                       |
| <i>B. producta</i>                        | $9.98 \times 10^7$ | $6.40 \times 10^6$ | $3.69 \times 10^8$    |
| <i>C. albicans</i>                        | 0                  | 0                  | 0                     |
|                                           |                    |                    |                       |
| <i>L. acidophilus</i>                     |                    |                    |                       |
| <i>L. acidophilus</i>                     | $4.40 \times 10^9$ | $3.07 \times 10^8$ | $2.94 \times 10^{10}$ |
| <i>C. albicans</i>                        | $1.52 \times 10^4$ | $3.21 \times 10^3$ | $1.59 \times 10^5$    |
|                                           |                    |                    |                       |
| <i>L. reuteri</i>                         |                    |                    |                       |
| <i>L. reuteri</i>                         | $2.37 \times 10^8$ | $3.70 \times 10^7$ | $5.28 \times 10^8$    |

|                                                                                                       |                         |                         |                         |
|-------------------------------------------------------------------------------------------------------|-------------------------|-------------------------|-------------------------|
| <i>C. albicans</i>                                                                                    | 0                       | 0                       | 1.78 x 10 <sup>3</sup>  |
| <b>Bacterial Add Back<br/>Germ-free Mice<br/>(Fig. 2g-h)<br/>Day 20</b>                               |                         |                         |                         |
| <i>B. producta</i>                                                                                    |                         |                         |                         |
| <i>B. producta</i>                                                                                    | 6.03 x 10 <sup>10</sup> | 4.93 x 10 <sup>10</sup> | 6.73 x 10 <sup>10</sup> |
| <i>C. albicans</i>                                                                                    | 0                       | 0                       | 0                       |
| <i>B. thetaiotamicron</i>                                                                             |                         |                         |                         |
| <i>B. thetaiotamicron</i>                                                                             | 2.08 x 10 <sup>10</sup> | 1.06 x 10 <sup>10</sup> | 2.78 x 10 <sup>10</sup> |
| <i>C. albicans</i>                                                                                    | 3.72 x 10 <sup>2</sup>  | 2.22 x 10 <sup>2</sup>  | 4.56 x 10 <sup>2</sup>  |
| <b>Mimosine Mouse<br/>Experiments<br/><i>C. albicans</i> GI<br/>Colonization Levels<br/>(Fig. 4a)</b> |                         |                         |                         |
| Day 1                                                                                                 |                         |                         |                         |
| <i>Hif1a</i> <sup>fl/fl</sup>                                                                         | 1.50 x 10 <sup>7</sup>  | 1.18 x 10 <sup>7</sup>  | 2.02 x 10 <sup>7</sup>  |
| <i>Hif1a</i> <sup>fl/fl</sup> , Mimosine                                                              | 2.07 x 10 <sup>7</sup>  | 1.21 x 10 <sup>7</sup>  | 2.34 x 10 <sup>7</sup>  |
| HIF-1α <sup>H1H1</sup> Vil-Cre+,<br>Mimosine                                                          | 1.70 x 10 <sup>7</sup>  | 8.15 x 10 <sup>6</sup>  | 2.17 x 10 <sup>7</sup>  |
| Day 2                                                                                                 |                         |                         |                         |
| <i>Hif1a</i> <sup>fl/fl</sup>                                                                         | 1.54 x 10 <sup>7</sup>  | 1.06 x 10 <sup>7</sup>  | 2.70 x 10 <sup>7</sup>  |
| <i>Hif1a</i> <sup>fl/fl</sup> , Mimosine                                                              | 7.61 x 10 <sup>6</sup>  | 5.75 x 10 <sup>6</sup>  | 8.64 x 10 <sup>6</sup>  |
| HIF-1α <sup>H1H1</sup> Vil-Cre+,<br>Mimosine                                                          | 1.35 x 10 <sup>7</sup>  | 7.69 x 10 <sup>6</sup>  | 2.00 x 10 <sup>7</sup>  |
| Day 3                                                                                                 |                         |                         |                         |
| <i>Hif1a</i> <sup>fl/fl</sup>                                                                         | 1.59 x 10 <sup>7</sup>  | 1.40 x 10 <sup>7</sup>  | 2.02 x 10 <sup>7</sup>  |
| <i>Hif1a</i> <sup>fl/fl</sup> , Mimosine                                                              | 9.25 x 10 <sup>6</sup>  | 8.09 x 10 <sup>6</sup>  | 1.05 x 10 <sup>7</sup>  |
| <i>Hif1a</i> <sup>fl/fl</sup> Vil-Cre+,<br>Mimosine                                                   | 1.53 x 10 <sup>7</sup>  | 8.81 x 10 <sup>6</sup>  | 2.07 x 10 <sup>7</sup>  |
| Day 4                                                                                                 |                         |                         |                         |
| <i>Hif1a</i> <sup>fl/fl</sup>                                                                         | 1.60 x 10 <sup>7</sup>  | 1.25 x 10 <sup>7</sup>  | 1.98 x 10 <sup>7</sup>  |
| <i>Hif1a</i> <sup>fl/fl</sup> , Mimosine                                                              | 1.01 x 10 <sup>7</sup>  | 7.10 x 10 <sup>6</sup>  | 1.10 x 10 <sup>7</sup>  |
| <i>Hif1a</i> <sup>fl/fl</sup> Vil-Cre+,<br>Mimosine                                                   | 1.29 x 10 <sup>7</sup>  | 1.10 x 10 <sup>7</sup>  | 2.05 x 10 <sup>7</sup>  |
| Day 5                                                                                                 |                         |                         |                         |
| <i>Hif1a</i> <sup>fl/fl</sup>                                                                         | 4.04 x 10 <sup>7</sup>  | 3.57 x 10 <sup>7</sup>  | 5.74 x 10 <sup>7</sup>  |
| <i>Hif1a</i> <sup>fl/fl</sup> , Mimosine                                                              | 4.66 x 10 <sup>5</sup>  | 1.69 x 10 <sup>5</sup>  | 6.80 x 10 <sup>5</sup>  |
| <i>Hif1a</i> <sup>fl/fl</sup> Vil-Cre+,<br>Mimosine                                                   | 2.21 x 10 <sup>7</sup>  | 1.72 x 10 <sup>7</sup>  | 3.04 x 10 <sup>7</sup>  |

|                                                                                                                       |                         |                         |                         |
|-----------------------------------------------------------------------------------------------------------------------|-------------------------|-------------------------|-------------------------|
| Mimosine                                                                                                              |                         |                         |                         |
|                                                                                                                       |                         |                         |                         |
| <b><i>C. albicans</i> GI<br/>Colonization Levels<br/>in HIF and CRAMP<br/>KO mice<br/>(ANTIBIOTICS)<br/>(Fig. 4f)</b> |                         |                         |                         |
| <i>Hif1a<sup>fl/fl</sup></i>                                                                                          |                         |                         |                         |
| Day 1, CA                                                                                                             | 4.43 x 10 <sup>6</sup>  | 2.62 x 10 <sup>6</sup>  | 9.92 x 10 <sup>6</sup>  |
| Day 1, <i>B. theta</i>                                                                                                | 4.39 x 10 <sup>10</sup> | 1.36 x 10 <sup>10</sup> | 6.49 x 10 <sup>10</sup> |
| Day 7, CA                                                                                                             | 2.00 x 10 <sup>4</sup>  | 8.23 x 10 <sup>5</sup>  | 4.21 x 10 <sup>4</sup>  |
| Day 7, <i>B. theta</i>                                                                                                | 2.21 x 10 <sup>10</sup> | 1.78 x 10 <sup>10</sup> | 2.89 x 10 <sup>10</sup> |
| Day 14, CA                                                                                                            | 0                       | 0                       | 0                       |
| Day 14, <i>B. theta</i>                                                                                               | 1.06 x 10 <sup>10</sup> | 8.50 x 10 <sup>19</sup> | 1.53 x 10 <sup>10</sup> |
| Day 21, CA                                                                                                            | 0                       | 0                       | 0                       |
| Day 21, <i>B. theta</i>                                                                                               | 4.25 x 10 <sup>9</sup>  | 2.5 x 10 <sup>9</sup>   | 9.59 x 10 <sup>9</sup>  |
| Day 28, CA                                                                                                            | 0                       | 0                       | 0                       |
| Day 28, <i>B. theta</i>                                                                                               | 8.54 x 10 <sup>9</sup>  | 4.11 x 10 <sup>9</sup>  | 1.61 x 10 <sup>10</sup> |
| <i>Hif1a<sup>fl/fl</sup> Vil-Cre+</i>                                                                                 |                         |                         |                         |
| Day 1, CA                                                                                                             | 1.55 x 10 <sup>7</sup>  | 9.93 x 10 <sup>6</sup>  | 2.51 x 10 <sup>7</sup>  |
| Day 1, <i>B. theta</i>                                                                                                | 4.32 x 10 <sup>10</sup> | 2.01 x 10 <sup>10</sup> | 5.24 x 10 <sup>10</sup> |
| Day 7, CA                                                                                                             | 1.05 x 10 <sup>7</sup>  | 8.85 x 10 <sup>6</sup>  | 1.27 x 10 <sup>7</sup>  |
| Day 7, <i>B. theta</i>                                                                                                | 1.69 x 10 <sup>10</sup> | 1.32 x 10 <sup>10</sup> | 2.96 x 10 <sup>10</sup> |
| Day 14, CA                                                                                                            | 3.55 x 10 <sup>6</sup>  | 1.71 x 10 <sup>6</sup>  | 1.68 x 10 <sup>7</sup>  |
| Day 14, <i>B. theta</i>                                                                                               | 6.61 x 10 <sup>9</sup>  | 2.65 x 10 <sup>9</sup>  | 9.19 x 10 <sup>9</sup>  |
| Day 21, CA                                                                                                            | 4.73 x 10 <sup>6</sup>  | 1.67 x 10 <sup>6</sup>  | 1.42 x 10 <sup>7</sup>  |
| Day 21, <i>B. theta</i>                                                                                               | 4.42 x 10 <sup>10</sup> | 2.62 x 10 <sup>10</sup> | 9.91 x 10 <sup>10</sup> |
| Day 28, CA                                                                                                            | 1.24 x 10 <sup>6</sup>  | 8.80 x 10 <sup>5</sup>  | 1.18 x 10 <sup>7</sup>  |
| Day 28, <i>B. theta</i>                                                                                               | 2.11 x 10 <sup>10</sup> | 1.25 x 10 <sup>10</sup> | 2.35 x 10 <sup>10</sup> |
| <b><i>Cramp</i> KO</b>                                                                                                |                         |                         |                         |
| Day 1, CA                                                                                                             | 2.01 x 10 <sup>7</sup>  | 1.10 x 10 <sup>7</sup>  | 5.29 x 10 <sup>7</sup>  |
| Day 1, <i>B. theta</i>                                                                                                | 4.39 x 10 <sup>10</sup> | 1.36 x 10 <sup>10</sup> | 6.49 x 10 <sup>10</sup> |
| Day 7, CA                                                                                                             | 2.40 x 10 <sup>7</sup>  | 2.31 x 10 <sup>7</sup>  | 2.82 x 10 <sup>7</sup>  |
| Day 7, <i>B. theta</i>                                                                                                | 2.21 x 10 <sup>10</sup> | 1.78 x 10 <sup>10</sup> | 2.89 x 10 <sup>10</sup> |
| Day 14, CA                                                                                                            | 1.01 x 10 <sup>7</sup>  | 6.39 x 10 <sup>6</sup>  | 1.98 x 10 <sup>7</sup>  |
| Day 14, <i>B. theta</i>                                                                                               | 4.34 x 10 <sup>9</sup>  | 2.25 x 10 <sup>9</sup>  | 8.18 x 10 <sup>9</sup>  |
| Day 21, CA                                                                                                            | 5.17 x 10 <sup>6</sup>  | 3.34 x 10 <sup>6</sup>  | 1.67 x 10 <sup>7</sup>  |
| Day 21, <i>B. theta</i>                                                                                               | 7.10 x 10 <sup>9</sup>  | 4.63 x 10 <sup>9</sup>  | 3.68 x 10 <sup>10</sup> |
| Day 28, CA                                                                                                            | 1.25 x 10 <sup>7</sup>  | 8.24 x 10 <sup>6</sup>  | 2.14 x 10 <sup>7</sup>  |
| Day 28, <i>B. theta</i>                                                                                               | 1.85 x 10 <sup>10</sup> | 1.67 x 10 <sup>10</sup> | 3.02 x 10 <sup>10</sup> |
|                                                                                                                       |                         |                         |                         |
| <b><i>C. albicans</i>/ <i>B. theta</i><br/>GI Colonization<br/>Levels in HIF and</b>                                  |                         |                         |                         |



|                                                                                                                 |                        |                        |                        |
|-----------------------------------------------------------------------------------------------------------------|------------------------|------------------------|------------------------|
| <b>CRAMP KO mice<br/>(NO ANTIBIOTICS)<br/>(Supplementary<br/>Figure 8a)</b>                                     |                        |                        |                        |
| <i>Hif1a<sup>fl/fl</sup></i>                                                                                    |                        |                        |                        |
| Day 1, CA                                                                                                       | 3.07 x 10 <sup>4</sup> | 1.31 x 10 <sup>4</sup> | 3.56 x 10 <sup>4</sup> |
| Day 7, CA                                                                                                       | 2.03 x 10 <sup>3</sup> | 0                      | 4.19 x 10 <sup>3</sup> |
| Day 14, CA                                                                                                      | 0                      | 0                      | 0                      |
| Day 21, CA                                                                                                      | 0                      | 0                      | 0                      |
| Day 28, CA                                                                                                      | 0                      | 0                      | 0                      |
| <i>Hif1a<sup>fl/fl</sup> Vil-Cre+</i>                                                                           |                        |                        |                        |
| Day 1, CA                                                                                                       | 7.45 x 10 <sup>4</sup> | 6.93 x 10 <sup>4</sup> | 7.96 x 10 <sup>4</sup> |
| Day 7, CA                                                                                                       | 3.67 x 10 <sup>3</sup> | 1.22 x 10 <sup>3</sup> | 4.99 x 10 <sup>3</sup> |
| Day 14, CA                                                                                                      | 0                      | 0                      | 0                      |
| Day 21, CA                                                                                                      | 0                      | 0                      | 0                      |
| Day 28, CA                                                                                                      | 0                      | 0                      | 0                      |
| <i>Cramp KO</i>                                                                                                 |                        |                        |                        |
| Day 1, CA                                                                                                       | 5.29 x 10 <sup>4</sup> | 1.89 x 10 <sup>4</sup> | 6.11 x 10 <sup>4</sup> |
| Day 7, CA                                                                                                       | 1.66 x 10 <sup>3</sup> | 1.63 x 10 <sup>2</sup> | 4.12 x 10 <sup>3</sup> |
| Day 14, CA                                                                                                      | 0                      | 0                      | 0                      |
| Day 21, CA                                                                                                      | 0                      | 0                      | 0                      |
| Day 28, CA                                                                                                      | 0                      | 0                      | 0                      |
|                                                                                                                 |                        |                        |                        |
| <b><i>C. albicans</i> GI<br/>Colonization Levels<br/>after SCFA treatment<br/>(Supplementary<br/>Figure 5d)</b> |                        |                        |                        |
| Water                                                                                                           | 1.43 x 10 <sup>8</sup> | 8.20 x 10 <sup>7</sup> | 2.05 x 10 <sup>8</sup> |
| Acetic Acid                                                                                                     | 7.7 x 10 <sup>6</sup>  | 5.20 x 10 <sup>6</sup> | 1.14 x 10 <sup>7</sup> |
| Butyric Acid                                                                                                    | 2.53 x 10 <sup>7</sup> | 1.28 x 10 <sup>7</sup> | 3.75 x 10 <sup>7</sup> |
| Propionic Acid                                                                                                  | 7.10 x 10 <sup>7</sup> | 2.32 x 10 <sup>7</sup> | 7.89 x 10 <sup>7</sup> |

Supplementary Table 3. Bacterial and Fungal strains used in this study

| Strain                                               | Reference  |
|------------------------------------------------------|------------|
| <i>Candida albicans</i> SC5314                       | 1          |
| <i>C. albicans</i> CAF2-1                            | 1          |
| <i>C. albicans</i> BWP17                             | 2          |
| <i>C. albicans</i> SN152                             | 3          |
| <i>C. albicans</i> WO-1                              | 4          |
| <i>C. albicans</i> Can098 (Clinical isolate, blood)  | This study |
| <i>C. albicans</i> 3153A (Clinical isolate, biofilm) | 5          |
| <i>Candida glabrata</i> , ATCC 15126                 | 6          |
| <i>Candida parapsilosis</i> , clinical isolate       | This study |
| <i>Candida tropicalis</i> , ATCC 66029               | 7          |
| <i>Bacteroidetes fragilis</i> ATCC 25285             | 8          |
| <i>Bacteroidetes thetaiotamicron</i> VPI-5482        | 9          |
| <i>Blautia producta</i> ATCC 27340                   | 8          |
| <i>Clostridium leptum</i> ATCC 29065                 | 10         |
| <i>Escherichia coli</i> ATCC 10798                   | 8          |
| <i>Lactobacillus acidophilus</i> ATCC 5357           | 8          |
| <i>Lactobacillus reuteri</i> , clinical strain       | This study |
| <i>Pseudomonas aeruginosa</i> , PAO1                 | 11         |

#### References

1. Fonzi, W.A. & Irwin, M.Y. Isogenic strain construction and gene mapping in *Candida albicans*. *Genetics* **134**, 717-728 (1993).

2. Wilson, R.B., Davis, D. & Mitchell, A.P. Rapid hypothesis testing with *Candida albicans* through gene disruption with short homology regions. *Journal of bacteriology* **181**, 1868-1874 (1999).
3. Navarathna, D.H., *et al.* Effect of farnesol on a mouse model of systemic candidiasis, determined by use of a DPP3 knockout mutant of *Candida albicans*. *Infect Immun* **75**, 1609-1618 (2007).
4. Butler, G., *et al.* Evolution of pathogenicity and sexual reproduction in eight *Candida* genomes. *Nature* **459**, 657-662 (2009).
5. Ramage, G., VandeWalle, K., Bachmann, S.P., Wickes, B.L. & Lopez-Ribot, J.L. In vitro pharmacodynamic properties of three antifungal agents against preformed *Candida albicans* biofilms determined by time-kill studies. *Antimicrobial agents and chemotherapy* **46**, 3634-3636 (2002).
6. Chen, W.B., Han, Y.F., Jong, S.C. & Chang, S.C. Isolation, purification, and characterization of a killer protein from *Schwanniomyces occidentalis*. *Applied and environmental microbiology* **66**, 5348-5352 (2000).
7. Turenne, C.Y., Sanche, S.E., Hoban, D.J., Karlowsky, J.A. & Kabani, A.M. Rapid identification of fungi by using the ITS2 genetic region and an automated fluorescent capillary electrophoresis system. *Journal of clinical microbiology* **37**, 1846-1851 (1999).
8. Barman, M., *et al.* Enteric salmonellosis disrupts the microbial ecology of the murine gastrointestinal tract. *Infect Immun* **76**, 907-915 (2008).
9. Goodman, A.L., *et al.* Identifying genetic determinants needed to establish a human gut symbiont in its habitat. *Cell Host Microbe* **6**, 279-289 (2009).
10. Matsuki, T., Watanabe, K., Fujimoto, J., Takada, T. & Tanaka, R. Use of 16S rRNA gene-targeted group-specific primers for real-time PCR analysis of predominant bacteria in human feces. *Appl Environ Microbiol* **70**, 7220-7228 (2004).
11. Koh, A.Y., Priebe, G.P. & Pier, G.B. Virulence of *Pseudomonas aeruginosa* in a murine model of gastrointestinal colonization and dissemination in neutropenia. *Infect Immun* **73**, 2262-2272 (2005).

Supplementary Table 4: Primers used in this study

| <b>Gene</b>                                            | <b>Forward Primer</b>       | <b>Reverse Primer</b>        |
|--------------------------------------------------------|-----------------------------|------------------------------|
| <b><i>Genotyping Primers</i></b>                       |                             |                              |
| HIF-1 $\alpha$ <sup>fl/fl</sup>                        | TGCTCATCAGTTGCCACTT         | GTTGGGGCAGTACTGGAAAG         |
| Vil-Cre                                                | GTGTGGGACAGAGAACAAACC       | ACATCTTCAGGTTCTGCGGG         |
| Primer A, B (Figure S4A)                               | GAAGTGTGAGTGAATAAATCCCG     | GAGAGAGAGACAAAGAGATACAGGTA   |
| <b><i>qPCR Primers</i></b>                             |                             |                              |
| Human HIF-1 $\alpha$                                   | GCCGCTGGAGACACACAATCAT      | CTGGTCATCAGTTTCTGTGTCG       |
| Mouse HIF-1 $\alpha$ (exon 2)                          | ATCTCGGCGAAGCAAAGAGTC       | TGGGGAAGTGGCAACTGAT          |
| Mouse HIF-1 $\alpha$ (exon 9)                          | GTGGTATTATTCAGCAGACTTG      | GGAGCCAGCAGAGTGAGAG          |
| LL-37                                                  | GCAGTCACCAGAGGATTGTGAC      | CACCGCTTCACCAGCCC            |
| CRAMP                                                  | TCTCTACCGTCTCCTGGACCTG      | CCACATACAGTCTCCTTCACTCG      |
| IL-17A                                                 | GGACTCTCCACCGCAATGA         | GGCACTGAGCTTCCCAGATC         |
| Mouse $\beta$ -Defensin1                               | TCCTGGTGATGATATGTTTTCTTTCT  | TGTTCTTCGTCCAAGACTTGTGA      |
| Mouse $\beta$ -Defensin2                               | GGCATTCTCACAAAGTCTTGGACGAAG | AGCTCTTACAACAGTTGGGCTTATCTGG |
| Human $\beta$ -Defensin1                               | GTCGCCATGAGAACTTCCTACC      | CATTGCCCTCCACTGCTGAC         |
| Human $\beta$ -Defensin2                               | GGTGTTTTTGGTGGTATAGGCG      | AGGGCAAAGACTGGATGAC          |
| 18S rRNA                                               | CATTCGAACGTCTGCCCTAT        | CCTGCTGCCTTCCTTGGA           |
| <b><i>Bacterial 16S rRNA gene primers</i></b>          |                             |                              |
| Eubacteria (all bacteria)                              | ACTCCTACGGGAGGCAGCAGT       | ATTACCGCGGCTGCTGGC           |
| Bacteroides                                            | GGTTCTGAGAGGAGGTCCC         | GCTGCCTCCCGTAGGAGT           |
| Mouse Intestinal Bacteroides (MIB)                     | CCAGCAGCCGCGGTAATA          | CGCATTCCGCATACTTCTC          |
| Lactobacillus/Enterococcus Group (LACT)                | AGCAGTAGGGAATCTTCCA         | CACCGCTACACATGGAG            |
| Eubacterium rectale/Clostridium coccoides group (EREC) | ACTCCTACGGGAGGCAGC          | GCTTCTTAGTCAGGTACCGTCAT      |
| Clostridium leptum group (CLEPT)                       | GCACAAGCAGTGGAGT            | CTTCCTCCGTTTTGTCAA           |
| Enterobacteriaceae (ENTERO)                            | GTGCCAGCMGCCGCGGTAA         | GCCTCAAGGGCACAACCTCCAAG      |
| Segmented filamentous bacteria (SFB)                   | GACGCTGAGGCATGAGAGCAT       | GACGGCACGGATTGTTATTCA        |
| <b><i>Fungal ITS Primers</i></b>                       |                             |                              |
| ITS1-2                                                 | CTTGGTCATTTAGAGGAAGTAA      | GCTGCGTTCTTCATCGATGC         |

|                             | Forward Primer              | Reverse Primer             | Probe                                |
|-----------------------------|-----------------------------|----------------------------|--------------------------------------|
| <i>Candida albicans</i>     | GCCTTACCACTACCGTCT<br>TTC   | ATTGCGCCCTCT<br>GGTATTC    | FAM-<br>AGGGAGAAACGACGCTCA<br>AACAG  |
| <i>Candida glabrata</i>     | CACTCACTTATCCCTCCC<br>TAGA  | CGAGCGCAAGCTTCT<br>CTATTA  | FAM-<br>CGCGCAAACGAGCAGCAG<br>AT     |
| <i>Candida parapsilosis</i> | TATCGCTCAACA<br>CCAAACCC    | TCGAATCTTTGA<br>ACGCACATTG | FAM-<br>AGGGTTTGAGGGAGAAAT<br>GACGCT |
| <i>Candida tropicalis</i>   | CGATGGAAGTTTGAGGC<br>AATAAC | CTCTCGGCCAAGGTTT<br>ATACT  | FAM-<br>TGTGATGCCCTTAGACGTT<br>CTGGG |
